# Supplementary material for: Using endogenous ligands for direct superparamagnetic nanoparticle cluster-based body fluid exosome separation
Source: Royal Society of Chemistry journal article supplement (doi:10.1039/c6ra24937j), 2017-01-01
Supplement: c6ra24937j1.pdf [file c6ra24937j1.pdf]

## Supplementary Information

# Using endogenous ligands for direct superparamagnetic nanoparticles cluster-based body fluid exosomes separation

Hongzhao Qi,<sup>a</sup> Huanhuan Jia,<sup>b</sup> Jimeng Sang,<sup>a</sup> Yu Ren,<sup>b,\*</sup> Jin Zhao,<sup>a,\*</sup> Xin Hou,<sup>a</sup> Xubo Yuan<sup>a</sup>

<sup>a</sup>Tianjin Key Laboratory of Composite and Functional Materials, School of Materials Science and Engineering, Tianjin University, Tianjin 300072, China.

<sup>b</sup>Tianjin Research Center of Basic Medical Science, Tianjin Medical University, Tianjin 300070, China.

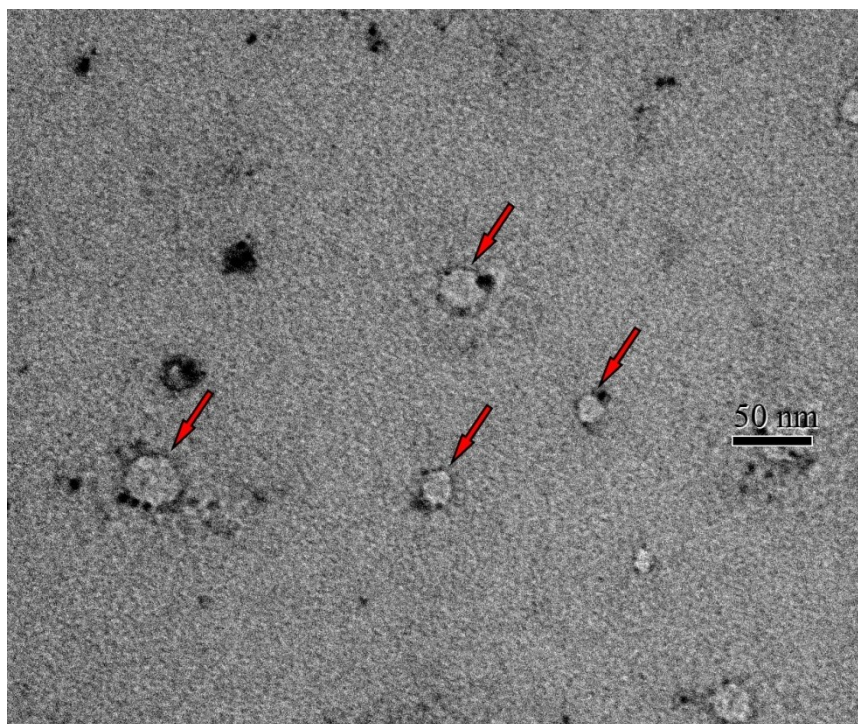

Figure S1. The TEM image of the products magnetically separated from untreated serum by 0.5 mg of M-Tfs.

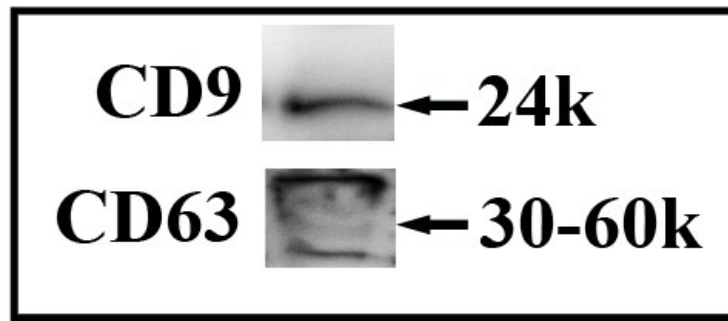

Figure S2. Western blot analysis of specific exosome marker proteins (CD9 and CD63) in products magnetically separated from untreated serum by 3.6 mg of M-Tfs.

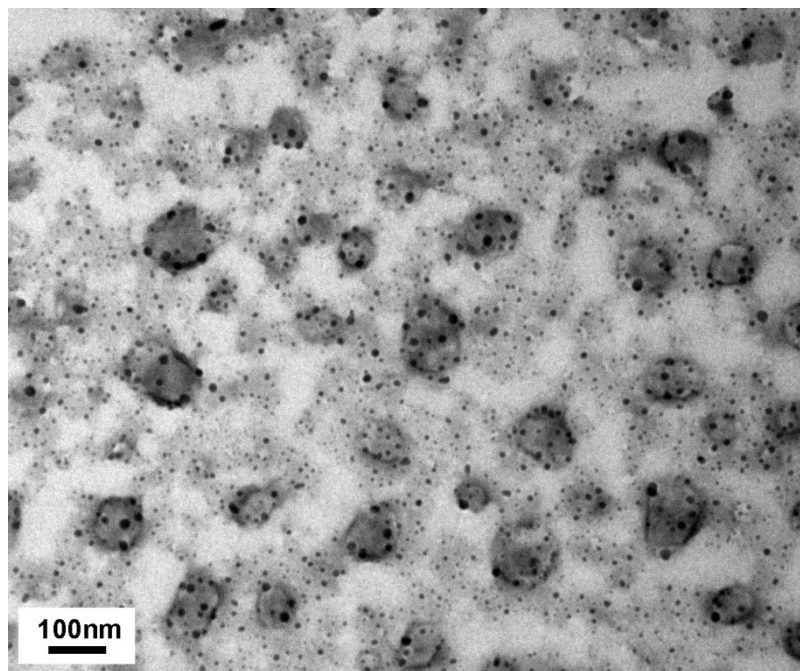

Figure S3. 3.6 mg of M-Tfs were added to untreated serum and incubated for 4 hours. After 24 hours of magnetic separation, the morphology of products was observed by TEM.
